# Supplementary material
Source: publisher figshare collection journal article supplement (https://tandf.figshare.com/articles/dataset/_/1568532)
Supplement: Supplementary file 1 [file 2]

A

**The individual siRNA's that constitute the SMARTpool for *C3orf14***

| SMARTpool siRNA catalog number | Sequence            | Targets      |
|--------------------------------|---------------------|--------------|
| J-017892-17                    | AAAAUGAGGCACAGCGAUA | NM_020685    |
|                                |                     | NM_001291941 |
|                                |                     | NM_001291942 |
| J-017892-18                    | UCGAUUAUCUCCUAAGUGA | NM_020685    |
|                                |                     | NM_001291941 |
|                                |                     | NM_001291942 |
| J-017892-19                    | AGAAUAAAUUGGGUGAUC  | NM_020685    |
|                                |                     | NM_001291941 |
|                                |                     | NM_001291942 |
| J-017892-20                    | GAGACUCGUUACUGGGCAU | NM_001291943 |
|                                |                     | NM_020685    |
|                                |                     | NM_001291941 |
|                                |                     | NM_001291942 |

B

**Primers for RT-PCR**

| Target    | Primer sequences, 5'-3'       | Size (bp) | Tm (°C) | GC (%) | Amplicon (bp) |
|-----------|-------------------------------|-----------|---------|--------|---------------|
| U1A1_F    | 5'-CAGTATGCCAAGACCGACTCAGA-3' | 23        | 61.83   | 52.17  | 215           |
| U1A2_R    | 5'-GGCCCCGGCATGTGGTGCATAA-3'  | 21        | 70.23   | 61.9   |               |
| C3orf14_F | 5'-GAAAAGGCATCTCAACTCCAAA-3'  | 22        | 58.86   | 40.91  | 111           |
| C3orf14_R | 5'-AAGTGGGTGAATCCTGGTCTG-3'   | 21        | 58.7    | 52.38  |               |

C

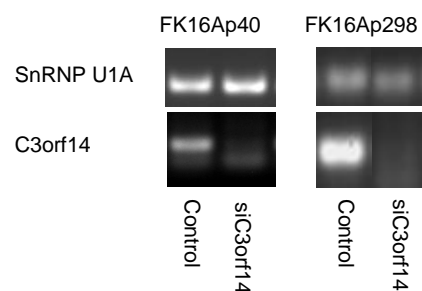

**Supplementary Figure S3. Knockdown of *C3orf14*.** (A) Catalog number, sequence, and target transcripts for the individual siRNA's that constitute the SMARTpool for *C3orf14*. All four transcript variants of the gene are included in the SMARTpool and therefore suppressed by siRNA transfection. (B) Primers for RT-PCR to confirm knockdown of *C3orf14*. F: forward; R: reverse; Tm: melting temperature. (C) *C3orf14* expression in control and siRNA treated FK16A cells at early (p40) and late (p298) passages for two typical experiments. SnRNP U1A was used as endogenous control.
