# Supplementary material
Source: publisher figshare collection journal article supplement (https://tandf.figshare.com/articles/dataset/_/1568532)
Supplement: Supplementary file 2 [file 2]

**Supplementary Table S2 - Hypermethylation and correlation to gene expression for individual CpG sites at 3p11.2-p14.2 in cervical cancer**

\* Spearman's rank correlation between methylation ( $\beta$ ) and gene expression

| Spearman's rank correlation between methylation (p) and gene expression |             |          |           |                                |          |                              |        |          |        |
|-------------------------------------------------------------------------|-------------|----------|-----------|--------------------------------|----------|------------------------------|--------|----------|--------|
| CpG site ID                                                             | Gene symbol | Location | Rel CpG-I | Hypermethylation frequency (%) |          | Gene expression correlation* |        |          |        |
| MAPINFO                                                                 |             |          |           | Cohort 1                       | Cohort 2 | Cohort 1                     |        | Cohort 2 |        |
|                                                                         |             |          |           |                                |          | Rho                          | Adj P  | Rho      | Adj P  |
| cg25736251                                                              | FHIT        | 61235869 | N_Shore   | 22.1                           | 20.7     | -0.40                        | 0.0000 | -0.32    | 0.0029 |
| cg15570148                                                              | FHIT        | 61235985 | N_Shore   | 14.8                           | 13.2     | -0.38                        | 0.0000 | -0.31    | 0.0044 |
| cg07212940                                                              | C3orf14     | 62304165 | N_Shore   | 13.4                           | 19.8     | -0.46                        | 0.0000 | -0.44    | 0.0000 |
| cg25119986                                                              | C3orf14     | 62304264 | N_Shore   | 13.4                           | 3.3      | -0.28                        | 0.0053 | -0.15    | 0.3256 |
| cg11120913                                                              | C3orf14     | 62304470 | N_Shore   | 51.7                           | 55.4     | -0.77                        | 0.0000 | -0.66    | 0.0000 |
| cg26896572                                                              | C3orf14     | 62304515 | Island    | 63.1                           | 66.9     | -0.79                        | 0.0000 | -0.71    | 0.0000 |
| cg01384143                                                              | C3orf14     | 62304554 | Island    | 75.2                           | 81.8     | -0.73                        | 0.0000 | -0.64    | 0.0000 |
| cg02221302                                                              | C3orf14     | 62304629 | Island    | 85.9                           | 86.0     | -0.63                        | 0.0000 | -0.55    | 0.0000 |
| cg15059608                                                              | C3orf14     | 62305003 | S_Shore   | 52.3                           | 47.9     | -0.76                        | 0.0000 | -0.60    | 0.0000 |
| cg22751696                                                              | C3orf14     | 62305147 | S_Shore   | 45.0                           | 52.9     | -0.75                        | 0.0000 | -0.62    | 0.0000 |
| cg01181009                                                              | C3orf14     | 62305213 | S_Shore   | 37.6                           | 40.5     | -0.67                        | 0.0000 | -0.54    | 0.0000 |
| cg12845975                                                              | C3orf14     | 62305226 | S_Shore   | 27.5                           | 33.9     | -0.63                        | 0.0000 | -0.43    | 0.0000 |
| cg14590206                                                              | C3orf14     | 62305285 | S_Shore   | 69.1                           | 67.8     | -0.36                        | 0.0001 | -0.20    | 0.1182 |
| cg02083234                                                              | FEZF2       | 62357769 | Island    | 68.5                           | 79.3     | -0.12                        | 0.4323 | -0.02    | 0.9484 |
| cg18104012                                                              | FEZF2       | 62358241 | Island    | 99.3                           | 98.3     | -0.09                        | 0.6841 | 0.01     | 0.9791 |
| cg26136365                                                              | FEZF2       | 62358379 | Island    | 86.6                           | 77.7     | -0.19                        | 0.1316 | -0.04    | 0.8922 |
| cg18902742                                                              | FEZF2       | 62358610 | Island    | 79.2                           | 84.3     | -0.06                        | 0.7233 | 0.06     | 0.8065 |
| cg19629292                                                              | FEZF2       | 62358980 | Island    | 77.9                           | 79.3     | -0.15                        | 0.2808 | 0.06     | 0.8365 |
| cg15812348                                                              | FEZF2       | 62359390 | Island    | 77.9                           | 85.1     | -0.09                        | 0.6466 | -0.02    | 0.9365 |
| cg19227130                                                              | FEZF2       | 62359392 | Island    | 96.6                           | 99.2     | -0.09                        | 0.6425 | -0.03    | 0.9142 |
| cg06423920                                                              | FEZF2       | 62359420 | Island    | 63.8                           | 65.3     | -0.14                        | 0.3109 | 0.01     | 0.9787 |
| cg24705960                                                              | FEZF2       | 62359456 | Island    | 100.0                          | 99.2     | -0.13                        | 0.4087 | 0.02     | 0.9498 |
| cg11374425                                                              | FEZF2       | 62359677 | Island    | 100.0                          | 100.0    | -0.16                        | 0.2144 | 0.06     | 0.8523 |
| cg08252579                                                              | FEZF2       | 62359773 | Island    | 91.3                           | 94.2     | -0.19                        | 0.1316 | -0.04    | 0.9020 |
| cg08681924                                                              | FEZF2       | 62359924 | S_Shore   | 92.6                           | 95.9     | -0.15                        | 0.2884 | -0.01    | 0.9704 |
| cg27564792                                                              | FEZF2       | 62360162 | S_Shore   | 43.0                           | 47.1     | -0.13                        | 0.4144 | 0.05     | 0.8691 |
| cg14261840                                                              | FEZF2       | 62360417 | S_Shore   | 79.9                           | 86.0     | -0.18                        | 0.1444 | -0.03    | 0.9262 |
| cg04927889                                                              | FEZF2       | 62360464 | S_Shore   | 83.2                           | 88.4     | -0.13                        | 0.4108 | -0.08    | 0.7453 |
| cg06819546                                                              | FEZF2       | 62360674 | N_Shore   | 83.9                           | 90.1     | -0.06                        | 0.7233 | -0.19    | 0.1482 |
| cg09024435                                                              | FEZF2       | 62360893 | N_Shore   | 60.4                           | 69.4     | 0.01                         | 0.9698 | -0.09    | 0.7145 |
| cg04191342                                                              | CADPS       | 62859289 | N_Shore   | 30.2                           | 41.3     | -0.11                        | 0.4965 | -0.03    | 0.9297 |
| cg15997484                                                              | CADPS       | 62859461 | N_Shore   | 54.4                           | 58.7     | -0.02                        | 0.8941 | 0.02     | 0.9484 |
| cg27476262                                                              | CADPS       | 62859618 | Island    | 51.0                           | 60.3     | 0.00                         | 0.9948 | 0.02     | 0.9609 |
| cg15914463                                                              | CADPS       | 62860103 | Island    | 44.3                           | 51.2     | 0.02                         | 0.9605 | 0.06     | 0.8172 |
| cg13514230                                                              | CADPS       | 62860224 | Island    | 71.8                           | 73.6     | -0.07                        | 0.7233 | 0.08     | 0.7495 |
| cg21458907                                                              | CADPS       | 62860802 | Island    | 94.0                           | 93.4     | -0.20                        | 0.1042 | -0.04    | 0.8922 |
| cg15957055                                                              | CADPS       | 62861055 | Island    | 87.9                           | 77.7     | -0.15                        | 0.2708 | -0.14    | 0.3553 |
| cg11905007                                                              | CADPS       | 62861071 | Island    | 94.0                           | 90.1     | -0.11                        | 0.5348 | -0.16    | 0.2674 |
| cg13491481                                                              | CADPS       | 62861142 | Island    | 100.0                          | 100.0    | -0.20                        | 0.1093 | -0.05    | 0.8880 |
| cg25947544                                                              | CADPS       | 62861145 | Island    | 100.0                          | 100.0    | -0.18                        | 0.1607 | -0.04    | 0.8922 |
| cg02719752                                                              | CADPS       | 62861245 | S_Shore   | 96.0                           | 96.7     | -0.11                        | 0.5431 | -0.23    | 0.0585 |
| cg23825335                                                              | CADPS       | 62861311 | S_Shore   | 100.0                          | 100.0    | -0.12                        | 0.4807 | -0.19    | 0.1570 |
| cg24505341                                                              | CADPS       | 62861544 | S_Shore   | 90.6                           | 93.4     | -0.16                        | 0.2267 | -0.26    | 0.0299 |
| cg21534264                                                              | CADPS       | 62861631 | S_Shore   | 87.9                           | 88.4     | -0.09                        | 0.6841 | -0.09    | 0.6998 |
| cg10748355                                                              | CADPS       | 62861796 | S_Shore   | 99.3                           | 100.0    | -0.07                        | 0.7233 | -0.21    | 0.1096 |
| cg09379755                                                              | CADPS       | 62861925 | S_Shore   | 53.0                           | 61.2     | -0.04                        | 0.8433 | -0.13    | 0.4603 |
| cg22189386                                                              | SYNPR       | 63263752 | N_Shore   | 14.8                           | 22.3     | 0.07                         | 0.7233 | -0.06    | 0.8570 |
| cg09462808                                                              | SYNPR       | 63263824 | N_Shore   | 96.0                           | 96.7     | 0.10                         | 0.6053 | -0.05    | 0.8706 |
| cg04785972                                                              | SYNPR       | 63263828 | N_Shore   | 71.1                           | 76.9     | 0.04                         | 0.8433 | 0.02     | 0.9484 |
| cg06314761                                                              | SYNPR       | 63263832 | N_Shore   | 76.5                           | 77.7     | 0.07                         | 0.7233 | -0.04    | 0.9020 |
| cg08536228                                                              | SYNPR       | 63264063 | Island    | 96.6                           | 98.3     | -0.02                        | 0.9342 | -0.07    | 0.7622 |
| cg25854303                                                              | SYNPR       | 63264142 | Island    | 81.9                           | 85.1     | 0.07                         | 0.7233 | -0.15    | 0.3474 |
| cg15056773                                                              | SYNPR       | 63264249 | S_Shore   | 94.6                           | 94.2     | 0.00                         | 0.9909 | -0.09    | 0.7145 |
| cg14183384                                                              | SYNPR       | 63264335 | S_Shore   | 93.3                           | 93.4     | -0.04                        | 0.8532 | -0.11    | 0.5617 |
| cg15772216                                                              | SYNPR       | 63264919 | S_Shore   | 96.0                           | 95.0     | 0.01                         | 0.9770 | -0.16    | 0.2779 |
| cg15559684                                                              | SYNPR       | 63428234 |           | 90.6                           | 95.0     | -0.03                        | 0.8714 | -0.12    | 0.5238 |
| cg06185146                                                              | SYNPR       | 63428305 |           | 11.4                           | 13.2     | -0.03                        | 0.8700 | -0.04    | 0.9020 |
| cg25506386                                                              | ATXN7       | 63849756 | Island    | 55.0                           | 43.8     | 0.16                         | 0.2385 | -0.17    | 0.2350 |
| cg25506386                                                              | THOC7       | 63849756 | Island    | 55.0                           | 43.8     | -0.01                        | 0.9770 | -0.21    | 0.0975 |
| cg06286796                                                              | PSMD6       | 64008041 | N_Shore   | 46.3                           | 47.1     | -0.21                        | 0.0834 | 0.12     | 0.5238 |

|            |          |          |         |       |       |       |        |       |        |
|------------|----------|----------|---------|-------|-------|-------|--------|-------|--------|
| cg22801134 | PRICKLE2 | 64210439 |         | 17.4  | 12.4  | -0.12 | 0.4275 | 0.03  | 0.9020 |
| cg23047271 | PRICKLE2 | 64210991 |         | 32.2  | 39.7  | 0.04  | 0.8460 | -0.23 | 0.0676 |
| cg25818214 | PRICKLE2 | 64211155 |         | 22.1  | 25.6  | -0.03 | 0.8762 | -0.28 | 0.0136 |
| cg02147797 | PRICKLE2 | 64211204 |         | 26.8  | 30.6  | 0.04  | 0.8348 | -0.24 | 0.0434 |
| cg07480640 | PRICKLE2 | 64211328 |         | 43.6  | 47.1  | -0.05 | 0.7786 | -0.28 | 0.0136 |
| cg22083047 | PRICKLE2 | 64211464 |         | 18.1  | 5.8   | 0.03  | 0.8799 | -0.24 | 0.0504 |
| cg22081832 | ADAMTS9  | 64670459 | N_Shore | 30.9  | 16.5  | 0.07  | 0.7233 | -0.23 | 0.0597 |
| cg25859972 | ADAMTS9  | 64670515 | N_Shore | 14.8  | 12.4  | 0.07  | 0.7233 | -0.25 | 0.0354 |
| cg03427905 | ADAMTS9  | 64671378 | Island  | 57.0  | 69.4  | -0.14 | 0.3346 | -0.31 | 0.0048 |
| cg04366011 | ADAMTS9  | 64671477 | Island  | 66.4  | 75.2  | -0.18 | 0.1438 | -0.18 | 0.1834 |
| cg12478384 | ADAMTS9  | 64671764 | Island  | 58.4  | 73.6  | -0.17 | 0.1867 | -0.27 | 0.0254 |
| cg23070026 | ADAMTS9  | 64672542 | Island  | 65.1  | 78.5  | -0.10 | 0.5574 | -0.37 | 0.0004 |
| cg11427510 | ADAMTS9  | 64673495 | Island  | 94.6  | 99.2  | -0.18 | 0.1468 | -0.26 | 0.0320 |
| cg21878275 | ADAMTS9  | 64673501 | Island  | 99.3  | 100.0 | -0.12 | 0.4275 | -0.25 | 0.0432 |
| cg17626022 | ADAMTS9  | 64673914 | Island  | 100.0 | 100.0 | -0.15 | 0.2622 | -0.19 | 0.1570 |
| cg25121125 | ADAMTS9  | 64674314 | S_Shore | 49.0  | 64.5  | -0.14 | 0.3423 | -0.25 | 0.0423 |
| cg15764058 | MAGI1    | 66024691 | Island  | 51.0  | 55.4  | -0.04 | 0.8532 | -0.02 | 0.9484 |
| cg06096184 | LRIG1    | 66549732 | N_Shore | 63.1  | 49.6  | -0.57 | 0.0000 | -0.61 | 0.0000 |
| cg01709518 | FAM19A1  | 68053484 | N_Shelf | 23.5  | 31.4  | -0.11 | 0.5124 | -0.05 | 0.8864 |
| cg08495813 | FAM19A4  | 68980320 | N_Shore | 47.7  | 62.8  | -0.01 | 0.9698 | -0.02 | 0.9475 |
| cg01405004 | FAM19A4  | 68980539 | N_Shore | 73.8  | 81.8  | -0.08 | 0.7135 | -0.03 | 0.9365 |
| cg03186486 | FAM19A4  | 68980947 | Island  | 53.0  | 61.2  | -0.08 | 0.7135 | -0.07 | 0.7757 |
| cg15356923 | FAM19A4  | 68981011 | Island  | 93.3  | 98.3  | -0.07 | 0.7233 | -0.15 | 0.3474 |
| cg23967169 | FAM19A4  | 68981503 | Island  | 79.9  | 78.5  | -0.09 | 0.6949 | -0.07 | 0.8031 |
| cg12417685 | FAM19A4  | 68981852 | Island  | 100.0 | 100.0 | -0.08 | 0.7135 | -0.10 | 0.6721 |
| cg12219082 | FAM19A4  | 68981854 | Island  | 99.3  | 100.0 | -0.06 | 0.7260 | -0.10 | 0.6786 |
| cg09868336 | FAM19A4  | 68981866 | Island  | 96.6  | 95.0  | 0.01  | 0.9770 | -0.11 | 0.5794 |
| cg12412079 | FAM19A4  | 68981877 | Island  | 98.7  | 99.2  | -0.01 | 0.9698 | -0.07 | 0.7728 |
| cg13921352 | FAM19A4  | 68981890 | Island  | 84.6  | 90.1  | -0.07 | 0.7233 | -0.09 | 0.7145 |
| cg20375342 | FAM19A4  | 68981895 | Island  | 82.6  | 85.1  | -0.03 | 0.8730 | -0.07 | 0.8065 |
| cg05893614 | FAM19A4  | 68981956 | Island  | 87.2  | 89.3  | -0.04 | 0.8363 | -0.09 | 0.7145 |
| cg08038353 | FAM19A4  | 68982064 | S_Shore | 73.2  | 85.1  | -0.04 | 0.8433 | -0.09 | 0.6788 |
| cg03427298 | FAM19A4  | 68982098 | S_Shore | 83.2  | 87.6  | -0.04 | 0.8312 | -0.03 | 0.9020 |
| cg06070625 | MITF     | 69812798 |         | 11.4  | 16.5  | 0.11  | 0.5204 | 0.10  | 0.6716 |
| cg09325003 | MITF     | 69812885 |         | 32.2  | 34.7  | 0.06  | 0.7233 | 0.08  | 0.7599 |
| cg03831180 | MITF     | 69915302 |         | 12.8  | 12.4  | 0.04  | 0.8603 | 0.09  | 0.7145 |
| cg13523819 | MITF     | 69915449 |         | 10.1  | 5.0   | 0.04  | 0.8603 | -0.05 | 0.8714 |
| cg05384123 | FOXP1    | 71294341 |         | 14.8  | 12.4  | -0.08 | 0.7021 | -0.24 | 0.0504 |
| cg12431087 | FOXP1    | 71355122 |         | 61.1  | 62.0  | -0.09 | 0.6841 | -0.20 | 0.1265 |
| cg20506347 | FOXP1    | 71355161 |         | 59.7  | 63.6  | -0.09 | 0.6841 | -0.20 | 0.1265 |
| cg22888463 | EIF4E3   | 71779016 |         | 12.8  | 12.4  | -0.17 | 0.2003 | 0.04  | 0.8922 |
| cg13026730 | EIF4E3   | 71804139 | Island  | 16.1  | 18.2  | 0.08  | 0.7021 | -0.20 | 0.1265 |
| cg04087740 | EIF4E3   | 71804142 | Island  | 17.4  | 17.4  | 0.07  | 0.7233 | -0.11 | 0.5426 |
| cg13026730 | GPR27    | 71804139 | Island  | 16.1  | 18.2  | -0.30 | 0.0017 | -0.38 | 0.0002 |
| cg04087740 | GPR27    | 71804142 | Island  | 17.4  | 17.4  | -0.31 | 0.0012 | -0.38 | 0.0003 |
| cg09655952 | PROK2    | 71833631 | N_Shore | 28.2  | 30.6  | -0.06 | 0.7233 | -0.15 | 0.3256 |
| cg01025398 | PROK2    | 71833878 | N_Shore | 88.6  | 95.9  | 0.07  | 0.7233 | -0.08 | 0.7599 |
| cg15798455 | PROK2    | 71833907 | N_Shore | 40.9  | 47.9  | 0.11  | 0.4965 | -0.13 | 0.4098 |
| cg19388776 | PROK2    | 71835112 | S_Shore | 73.8  | 77.7  | 0.07  | 0.7233 | -0.01 | 0.9787 |
| cg05523500 | PPP4R2   | 73046033 | Island  | 20.8  | 23.1  | 0.08  | 0.7070 | 0.16  | 0.2779 |
| cg25865467 | PDZRN3   | 73673231 | Island  | 61.1  | 75.2  | -0.18 | 0.1468 | -0.23 | 0.0675 |
| cg20132590 | PDZRN3   | 73673893 | Island  | 89.3  | 91.7  | -0.14 | 0.3624 | -0.08 | 0.7355 |
| cg11148130 | PDZRN3   | 73674068 | Island  | 63.8  | 68.6  | -0.13 | 0.4092 | -0.13 | 0.4098 |
| cg26055770 | PDZRN3   | 73674070 | Island  | 67.1  | 70.2  | -0.13 | 0.4092 | -0.11 | 0.5719 |
| cg25486757 | PDZRN3   | 73674074 | Island  | 65.8  | 66.9  | -0.16 | 0.2265 | -0.13 | 0.4370 |
| cg08141424 | PDZRN3   | 73674087 | Island  | 65.1  | 68.6  | -0.17 | 0.1882 | -0.16 | 0.2994 |
| cg10111115 | PDZRN3   | 73674146 | Island  | 61.7  | 59.5  | -0.15 | 0.2995 | -0.07 | 0.7728 |
| cg05502701 | PDZRN3   | 73674160 | Island  | 93.3  | 90.9  | -0.19 | 0.1411 | -0.15 | 0.3474 |
| cg24353443 | PDZRN3   | 73674166 | Island  | 92.6  | 96.7  | -0.21 | 0.0834 | -0.20 | 0.1265 |
| cg14473924 | PDZRN3   | 73674170 | Island  | 73.2  | 74.4  | -0.23 | 0.0375 | -0.23 | 0.0675 |
| cg23489627 | PDZRN3   | 73674339 | Island  | 53.7  | 52.9  | -0.24 | 0.0289 | -0.18 | 0.2034 |
| cg13688769 | PDZRN3   | 73674363 | Island  | 65.8  | 65.3  | -0.21 | 0.0834 | -0.15 | 0.3256 |
| cg21751983 | PDZRN3   | 73674433 | S_Shore | 76.5  | 92.6  | -0.16 | 0.2385 | -0.13 | 0.4098 |
| cg23822879 | PDZRN3   | 73674591 | S_Shore | 43.0  | 48.8  | -0.20 | 0.0834 | -0.20 | 0.1265 |
| cg03869608 | PDZRN3   | 73674656 | S_Shore | 62.4  | 73.6  | -0.20 | 0.0834 | -0.20 | 0.1265 |
| cg14753334 | PDZRN3   | 73674702 | S_Shore | 85.2  | 95.0  | -0.24 | 0.0289 | -0.21 | 0.0975 |
| cg27409478 | ZNF717   | 75834335 | Island  | 83.2  | 84.3  | -0.53 | 0.0000 | -0.44 | 0.0000 |

|            |        |          |         |       |       |       |        |       |        |
|------------|--------|----------|---------|-------|-------|-------|--------|-------|--------|
| cg02621032 | ZNF717 | 75834525 | Island  | 77.9  | 76.0  | -0.46 | 0.0000 | -0.36 | 0.0005 |
| cg25964040 | ZNF717 | 75834703 | Island  | 47.0  | 43.0  | -0.08 | 0.7021 | 0.10  | 0.6421 |
| cg16718624 | ROBO2  | 77089518 | S_Shore | 81.2  | 89.3  | -0.21 | 0.0739 | -0.20 | 0.1265 |
| cg11980129 | ROBO1  | 79815639 | Island  | 88.6  | 94.2  | -0.03 | 0.8829 | -0.09 | 0.7162 |
| cg04562217 | ROBO1  | 79815718 | Island  | 99.3  | 99.2  | -0.01 | 0.9698 | -0.08 | 0.7622 |
| cg15325658 | ROBO1  | 79815782 | Island  | 100.0 | 100.0 | 0.10  | 0.6347 | 0.03  | 0.9133 |
| cg21865845 | ROBO1  | 79815848 | Island  | 87.9  | 88.4  | 0.08  | 0.7021 | 0.12  | 0.5121 |
| cg07287167 | ROBO1  | 79816794 | S_Shore | 84.6  | 81.0  | -0.06 | 0.7233 | -0.14 | 0.3925 |
| cg10243398 | ROBO1  | 79816838 | S_Shore | 95.3  | 95.9  | -0.01 | 0.9770 | -0.08 | 0.7336 |
| cg07997035 | ROBO1  | 79816949 | S_Shore | 92.6  | 97.5  | -0.06 | 0.7233 | -0.04 | 0.8922 |
| cg21743712 | ROBO1  | 79817125 | S_Shore | 70.5  | 80.2  | -0.11 | 0.5124 | -0.06 | 0.8265 |
| cg08661007 | ROBO1  | 79817232 | S_Shore | 81.2  | 86.8  | -0.03 | 0.8829 | 0.04  | 0.9020 |
| cg18703601 | ROBO1  | 79817278 | S_Shore | 92.6  | 95.9  | -0.06 | 0.7260 | 0.03  | 0.9142 |
| cg11630696 | ROBO1  | 79817333 | S_Shore | 89.3  | 91.7  | -0.08 | 0.7021 | 0.07  | 0.7728 |
| cg07356753 | GBE1   | 81810745 | Island  | 47.7  | 68.6  | 0.17  | 0.2016 | -0.01 | 0.9791 |
| cg03147002 | CADM2  | 85007732 | N_Shore | 68.5  | 71.1  | -0.18 | 0.1468 | 0.02  | 0.9484 |
| cg15355387 | CADM2  | 85007817 | N_Shore | 61.1  | 67.8  | -0.08 | 0.7135 | 0.02  | 0.9609 |
| cg20541723 | CADM2  | 85007894 | N_Shore | 84.6  | 89.3  | -0.06 | 0.7260 | -0.01 | 0.9787 |
| cg06217406 | CADM2  | 85007959 | N_Shore | 77.9  | 84.3  | -0.08 | 0.7135 | 0.01  | 0.9638 |
| cg25649680 | CADM2  | 85007992 | N_Shore | 63.1  | 66.1  | -0.07 | 0.7233 | -0.01 | 0.9704 |
| cg24621982 | CADM2  | 85008061 | N_Shore | 79.9  | 80.2  | -0.08 | 0.7135 | 0.06  | 0.8523 |
| cg12989890 | CADM2  | 85008105 | N_Shore | 79.9  | 83.5  | -0.09 | 0.6841 | 0.02  | 0.9498 |
| cg26113636 | CADM2  | 85008156 | N_Shore | 99.3  | 100.0 | 0.00  | 0.9909 | 0.16  | 0.2779 |
| cg05152589 | CADM2  | 85008678 | Island  | 89.9  | 95.0  | -0.14 | 0.3624 | 0.03  | 0.9133 |
| cg22380921 | CADM2  | 85008786 | Island  | 90.6  | 95.0  | -0.14 | 0.3311 | 0.10  | 0.6421 |
| cg12458207 | CADM2  | 85008991 | S_Shore | 73.8  | 78.5  | -0.08 | 0.7021 | 0.08  | 0.7599 |
