# Supplementary material
Source: publisher figshare collection journal article supplement (https://tandf.figshare.com/articles/dataset/_/1568532)
Supplement: Supplementary file 3 [file 2]

**Supplementary Table S1.** Cervical cancer patient and tumor characteristics

| Characteristic                                                                             | Cohort 1 <sup>a</sup><br>(n=149) | Cohort 2<br>(n=121) |
|--------------------------------------------------------------------------------------------|----------------------------------|---------------------|
| FIGO stage (n)                                                                             |                                  |                     |
| 1B                                                                                         | 10                               | 13                  |
| 2                                                                                          | 93                               | 80                  |
| 3                                                                                          | 38                               | 23                  |
| 4A                                                                                         | 8                                | 5                   |
| Tumor size <sup>b</sup> : vol (cm <sup>3</sup> ) <sup>c</sup> , diameter (cm) <sup>d</sup> |                                  |                     |
| Median                                                                                     | 43.6, 4.4                        | 30.8, 3.9           |
| Range                                                                                      | 1.9-321, 1.5-8.5                 | 2.8-267, 1.8-8.0    |
| Pelvic lymph node status <sup>b</sup> (n)                                                  |                                  |                     |
| Positive                                                                                   | 63                               | 55                  |
| Negative                                                                                   | 86                               | 66                  |
| Age                                                                                        |                                  |                     |
| Median                                                                                     | 55                               | 53                  |
| Range                                                                                      | 24-82                            | 22-84               |
| Observation time (months) <sup>e</sup>                                                     |                                  |                     |
| Median                                                                                     | 70.4                             | 44.1                |
| Range                                                                                      | 37-152                           | 23-119.9            |
| Relapse (distant and/or local)                                                             | 46                               | 32                  |

<sup>a</sup> Patients in cohort 1 were also included in [1]

<sup>b</sup> Tumor size and lymph node status were determined from pretreatment magnetic resonance (MR) images.

<sup>c</sup> Volume was calculated based on 3 orthogonal diameters (a,b,c) as  $V=(\pi/6)*abc$ .

<sup>d</sup> Diameter was calculated from tumor volume  $V=(4\pi/3)*r^3$ .

<sup>e</sup> Patients who either got relapse or died of causes not related to cancer are not included.

## References

1. Lando M, Wilting SM, Snipstad K, *et al.* Identification of eight candidate target genes of the recurrent 3p12-p14 loss in cervical cancer by integrative genomic profiling. *J Pathol* 2013; 230:59-69.
