# Supplementary material
Source: publisher figshare collection journal article supplement (https://tandf.figshare.com/articles/dataset/_/1568532)
Supplement: Supplementary file 4 [file 2]

Supplementary Table S3 - Near diploid tumors (n=38) with gene dosage, gene expression and methylation status indicated.

| Patient | C3orf14     |                 |      | FHIT        |                 |      | GPR27       |                 |      | LRIG1       |                 |      | ZNF717      |                 |      | THOC7       |                 |      | PSMD6       |                 |      | ADAMTS9     |                 |      |
|---------|-------------|-----------------|------|-------------|-----------------|------|-------------|-----------------|------|-------------|-----------------|------|-------------|-----------------|------|-------------|-----------------|------|-------------|-----------------|------|-------------|-----------------|------|
|         | Gene dosage | Gene expression | Meth |
| P-002   | L           | 5.89            | M    | L           | 4.96            | NM   | L           | 6.64            | NM   | L           | 7.32            | NM   | L           | 6.10            | M    | L           | 10.93           | M    | L           | 10.39           | M    | L           | 6.07            | M    |
| P-004   | NL          | 9.09            | M    | NL          | 5.72            | NM   | NL          | 7.18            | NM   | NL          | 7.73            | M    | NL          | 6.27            | NM   | NL          | 10.93           | NM   | NL          | 10.60           | NM   | NL          | 6.59            | M    |
| P-018   | NL          | 9.90            | NM   | NL          | 5.25            | NM   | NL          | 6.49            | NM   | NL          | 7.66            | M    | NL          | 6.11            | M    | NL          | 11.45           | M    | NL          | 10.92           | NM   | NL          | 7.26            | NM   |
| P-024   | NL          | 9.35            | NM   | NL          | 5.16            | M    | NL          | 6.56            | NM   | NL          | 7.88            | M    | NL          | 6.09            | M    | NL          | 11.79           | M    | NL          | 10.75           | NM   | NL          | 6.71            | NM   |
| P-028   | NL          | 9.55            | NM   | NL          | 5.45            | NM   | NL          | 6.92            | NM   | NL          | 8.08            | M    | NL          | 6.16            | M    | NL          | 11.41           | NM   | NL          | 10.95           | NM   | NL          | 6.18            | M    |
| P-032   | L           | 9.39            | NM   | L           | 5.20            | NM   | L           | 6.46            | NM   | L           | 8.43            | NM   | L           | 5.39            | M    | L           | 10.61           | M    | L           | 10.26           | NM   | L           | 6.57            | NM   |
| P-053   | NL          | 6.05            | M    | NL          | 5.38            | M    | NL          | 6.69            | M    | NL          | 8.56            | NM   | NL          | 5.60            | M    | NL          | 10.68           | M    | NL          | 10.16           | NM   | NL          | 7.01            | NM   |
| P-063   | NL          | 8.06            | M    | NL          | 5.41            | NM   | NL          | 6.80            | M    | NL          | 7.12            | M    | NL          | 5.50            | M    | NL          | 10.95           | NM   | NL          | 10.95           | NM   | NL          | 6.88            | M    |
| P-068   | L           | 7.10            | M    | L           | 5.03            | NM   | L           | 6.44            | NM   | L           | 7.72            | NM   | L           | 6.10            | NM   | L           | 10.56           | NM   | L           | 10.16           | M    | L           | 6.64            | M    |
| P-072   | NL          | 6.33            | M    | NL          | 5.49            | NM   | NL          | 6.38            | M    | NL          | 8.21            | M    | NL          | 5.43            | M    | NL          | 11.26           | NM   | NL          | 10.87           | NM   | NL          | 6.20            | M    |
| P-074   | L           | 6.59            | M    | L           | 5.21            | M    | L           | 6.55            | NM   | L           | 6.71            | M    | L           | 5.25            | M    | L           | 11.13           | M    | L           | 10.48           | M    | L           | 6.06            | NM   |
| P-080   | L           | 8.67            | NM   | L           | 5.39            | NM   | L           | 6.52            | NM   | L           | 7.54            | NM   | L           | 5.81            | M    | L           | 10.63           | M    | L           | 10.25           | M    | L           | 6.83            | NM   |
| P-083   | NL          | 7.61            | M    | NL          | 5.65            | NM   | NL          | 6.64            | NM   | NL          | 9.12            | M    | NL          | 5.55            | M    | NL          | 10.86           | NM   | NL          | 10.72           | NM   | NL          | 6.70            | NM   |
| P-084   | L           | 6.52            | M    | L           | 5.36            | NM   | L           | 6.51            | NM   | L           | 8.30            | M    | L           | 5.52            | M    | L           | 10.35           | NM   | L           | 10.13           | NM   | L           | 6.15            | M    |
| P-087   | NL          | 8.74            | NM   | NL          | 5.41            | NM   | NL          | 6.67            | NM   | NL          | 8.22            | M    | NL          | 5.78            | M    | NL          | 10.89           | NM   | NL          | 10.32           | M    | NL          | 6.26            | M    |
| P-091   | NL          | 6.38            | M    | NL          | 5.41            | NM   | NL          | 6.49            | NM   | NL          | 8.83            | NM   | NL          | 6.23            | M    | NL          | 11.32           | NM   | NL          | 11.09           | NM   | NL          | 6.40            | M    |
| P-115   | L           | 6.32            | M    | L           | 5.72            | NM   | L           | 6.91            | NM   | L           | 7.60            | M    | L           | 5.24            | M    | L           | 10.67           | M    | L           | 10.00           | NM   | L           | 6.10            | NM   |
| P-120   | L           | 6.56            | M    | L           | 5.09            | NM   | L           | 6.39            | NM   | L           | 7.99            | NM   | L           | 5.87            | M    | L           | 10.58           | M    | L           | 10.14           | M    | L           | 6.07            | NM   |
| P-124   | NL          | 7.83            | M    | NL          | 5.29            | NM   | NL          | 6.34            | M    | NL          | 9.02            | M    | NL          | 5.93            | M    | NL          | 11.03           | NM   | NL          | 10.58           | NM   | NL          | 5.95            | M    |
| P-133   | L           | 8.32            | M    | L           | 5.44            | NM   | L           | 6.54            | NM   | L           | 8.35            | NM   | L           | 5.43            | M    | L           | 10.86           | NM   | L           | 9.89            | M    | L           | 6.23            | M    |
| P-142   | NL          | 9.52            | NM   | NL          | 5.50            | NM   | NL          | 6.45            | NM   | NL          | 8.37            | NM   | NL          | 5.92            | NM   | NL          | 11.42           | M    | NL          | 11.00           | NM   | NL          | 6.73            | M    |
| P-151   | NL          | 9.01            | M    | NL          | 5.17            | NM   | NL          | 6.56            | NM   | NL          | 8.30            | M    | NL          | 5.84            | M    | NL          | 11.00           | M    | NL          | 10.55           | M    | NL          | 7.23            | NM   |
| P-169   | NL          | 8.40            | M    | NL          | 5.59            | NM   | NL          | 7.00            | NM   | NL          | 8.37            | M    | NL          | 5.20            | M    | NL          | 11.55           | NM   | NL          | 10.49           | M    | NL          | 5.88            | M    |
| P-177   | NL          | 9.74            | NM   | NL          | 5.18            | M    | NL          | 6.82            | NM   | NL          | 7.60            | M    | NL          | 5.92            | M    | NL          | 11.65           | M    | NL          | 11.28           | NM   | NL          | 6.70            | NM   |
| P-182   | L           | 8.54            | M    | L           | 5.33            | NM   | L           | 6.43            | M    | L           | 6.48            | M    | L           | 6.37            | M    | L           | 11.57           | M    | L           | 11.01           | NM   | L           | 6.59            | M    |
| P-188   | NL          | 10.23           | NM   | NL          | 5.19            | M    | NL          | 6.73            | NM   | NL          | 6.85            | M    | NL          | 6.58            | M    | NL          | 11.48           | M    | NL          | 11.18           | M    | NL          | 7.32            | M    |
| P-190   | L           | 7.36            | M    | L           | 5.52            | NM   | L           | 6.74            | NM   | L           | 7.09            | M    | L           | 5.72            | M    | L           | 10.79           | NM   | L           | 10.61           | NM   | L           | 7.15            | M    |
| P-191   | L           | 9.84            | NM   | L           | 5.33            | NM   | L           | 6.48            | M    | L           | 7.42            | M    | L           | 5.69            | M    | L           | 10.99           | NM   | L           | 10.52           | M    | L           | 6.94            | M    |
| P-192   | L           | 9.67            | M    | L           | 5.49            | NM   | L           | 6.41            | NM   | L           | 7.45            | M    | L           | 6.44            | M    | L           | 11.34           | M    | L           | 10.81           | NM   | L           | 6.70            | NM   |
| P-193   | L           | 9.27            | M    | L           | 5.36            | NM   | L           | 6.72            | NM   | L           | 8.13            | M    | L           | 5.54            | M    | L           | 11.52           | M    | L           | 10.99           | M    | L           | 5.88            | M    |
| P-194   | NL          | 8.12            | M    | NL          | 5.47            | NM   | NL          | 6.40            | M    | NL          | 8.47            | M    | NL          | 5.68            | M    | NL          | 11.25           | M    | NL          | 10.86           | NM   | NL          | 6.21            | M    |
| P-196   | L           | 8.03            | NM   | L           | 5.53            | M    | L           | 6.35            | M    | L           | 9.00            | NM   | L           | 5.41            | M    | L           | 10.97           | M    | L           | 10.18           | M    | L           | 6.15            | M    |
| P-198   | NL          | 8.31            | M    | NL          | 5.19            | M    | NL          | 6.56            | NM   | NL          | 7.18            | NM   | NL          | 6.00            | M    | NL          | 10.88           | M    | NL          | 10.43           | M    | NL          | 6.51            | M    |
| P-202   | L           | 6.78            | M    | L           | 5.26            | NM   | L           | 6.80            | NM   | L           | 6.36            | M    | L           | 5.33            | M    | L           | 10.80           | NM   | L           | 10.29           | M    | L           | 5.96            | M    |
| P-208   | L           | 6.60            | M    | L           | 5.35            | NM   | L           | 6.49            | NM   | L           | 7.01            | M    | L           | 5.72            | M    | L           | 10.91           | M    | L           | 10.30           | NM   | L           | 5.51            | M    |
| P-210   | NL          | 10.42           | NM   | NL          | 5.59            | NM   | NL          | 6.75            | NM   | NL          | 8.62            | NM   | NL          | 6.06            | M    | NL          | 11.08           | NM   | NL          | 10.69           | M    | NL          | 7.11            | M    |
| P-213   | NL          | 6.39            | M    | NL          | 5.28            | NM   | NL          | 6.44            | NM   | NL          | 7.59            | M    | NL          | 5.58            | M    | NL          | 10.72           | M    | NL          | 10.41           | NM   | NL          | 5.95            | M    |
| P-215   | L           | 9.09            | NM   | NL          | 5.78            | NM   | L           | 6.69            | NM   | L           | 8.03            | M    | L           | 5.60            | M    | L           | 10.74           | M    | L           | 10.06           | NM   | L           | 5.84            | M    |

L: loss  
NL: no loss  
M: hypermethylated  
NM: not hypermethylated  
Gene expression: log2-data
