# Supplementary material
Source: publisher figshare collection journal article supplement (https://tandf.figshare.com/articles/dataset/_/1568532)
Supplement: Supplementary file 5 [file 2]

A

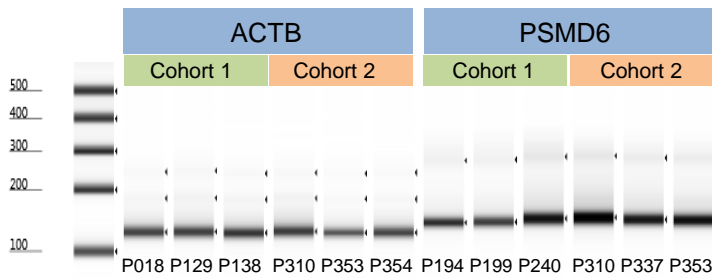

B

**Primers used for methylation-specific PCR**

| Gene <sup>a</sup> | Primer sequences, 5'-3'      | Amplicon (bp) <sup>b</sup> | T <sub>m</sub> (°C) <sup>c</sup> |
|-------------------|------------------------------|----------------------------|----------------------------------|
| ACTB_F            | TGGTGATGGAGGAGGTTTAGTAAGT    | 133                        | 60                               |
| ACTB_R            | AACCAATAAAACCTACTCCTCCCTTAA  |                            |                                  |
| PSMD6_F           | GTGTAAATTTTTCGATTGGTAGATAGAC | 154                        | 60                               |
| PSMD6_R           | CGACCTTTACCATCATTACATCG      |                            |                                  |

<sup>a</sup>F: Forward primer, R: Reverse primer

<sup>b</sup>bp: Base pair

<sup>c</sup>T<sub>m</sub>: Melting temperature

**Supplementary Figure S2. Methylation-specific PCR (MSP) of bisulfite converted DNA isolated by different methods.** (A) MSP products for selected tumors from cohort 1 and cohort 2 using primers for ACTB ( $\beta$ -actin) and PSMD6. DNA from tumors in cohort 1 was isolated using proteinase K, phenol, chloroform, and isoamylalcohol, whereas DNA from tumors in cohort 2 was isolated using PureLink™ Genomic DNA Mini Kit. (B) Primer sequences, amplicon length, and melting temperature for ACTB and PSMD6.
