# Supplementary material
Source: publisher figshare collection journal article supplement (https://tandf.figshare.com/articles/dataset/_/1568532)
Supplement: Supplementary file 6 [file 2]

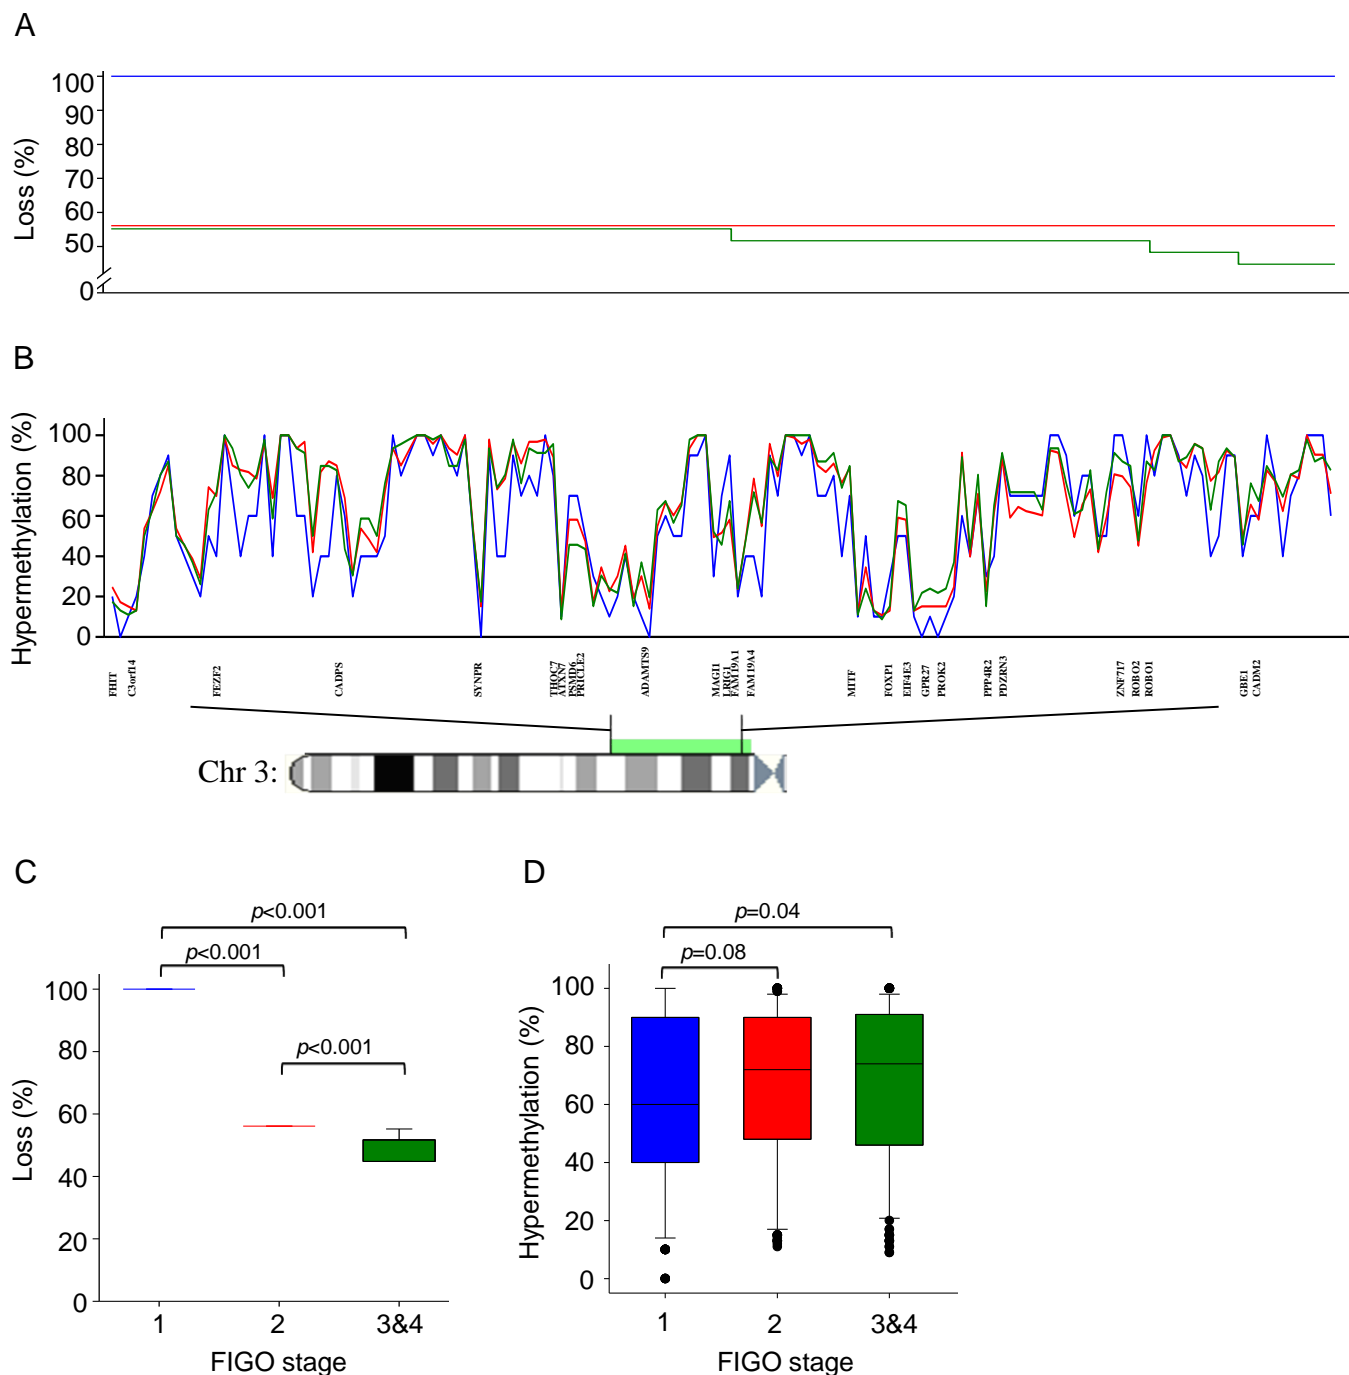

**Supplementary Figure S1. 3p chromosomal loss and hypermethylated CpG sites in cervical cancer stratified by FIGO-stage.** (A) Frequency of patients with chromosomal loss of 3p for FIGO-stage 1 (n=5), 2 (n=41), and 3&4 (n=29). (B) Frequency of patients with hypermethylation of 3p genes for FIGO-stage 1 (n=10), 2 (n=93), and 3&4 (n=46). CpG sites found to be hypermethylated in tumors compared to normal tissue in at least 10% of the patients are included and the gene symbols are indicated. (C, D) Box plots showing frequency of patients with chromosomal loss (C) and hypermethylation (D) of 3p stratified by FIGO-stage. The median frequency over the entire chromosomal region (C) and the 26 hypermethylated genes (D) is indicated for each group by the horizontal lines, and the edges of the boxes represent the first and third quartiles. *P*-values from Welch's t-test are indicated. Blue: stage 1; Red: stage 2; Green: stage 3&4.
