# Supplementary material
Source: publisher figshare collection journal article supplement (https://tandf.figshare.com/articles/dataset/_/1568532)
Supplement: Supplementary file 7 [file 3]

Archive with 6 entries (6 files):
- Table S3.pdf
- Table S2.pdf
- Figure S1.pdf
- Figure S3.pdf
- Table S1.pdf
- Figure S2.pdf
